# Supplementary material for: Gene expression profiling of human alveolar macrophages of phenotypically normal smokers and nonsmokers reveals a previously unrecognized subset of genes modulated by cigarette smoking
Source: Springer Nature journal article supplement (doi:10.1007/s00109-005-0008-2), 2006-03-06
Supplement: 109_2005_8_MOESM2_ESM.pdf [file 109_2005_8_MOESM2_ESM.pdf]

Supplemental  
Figure 1

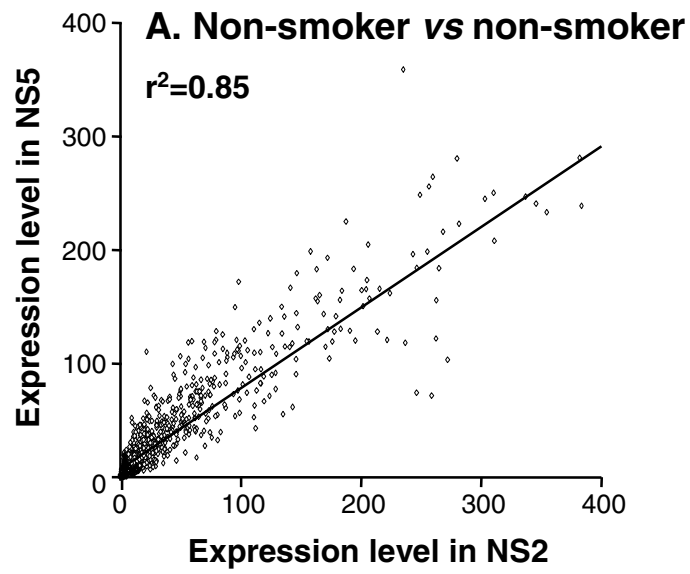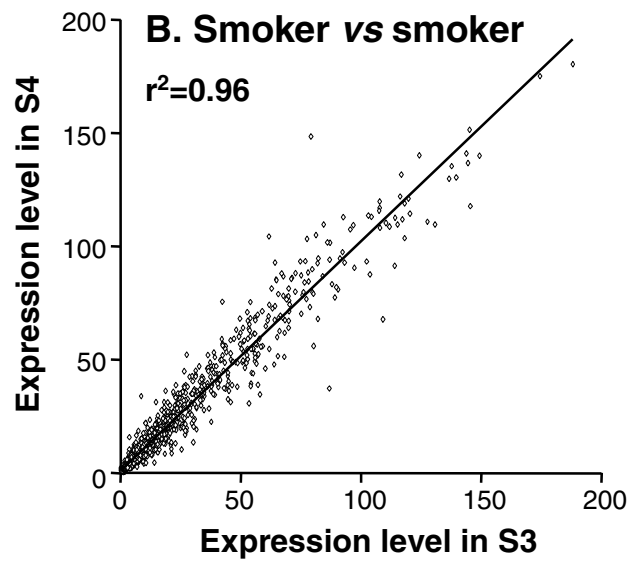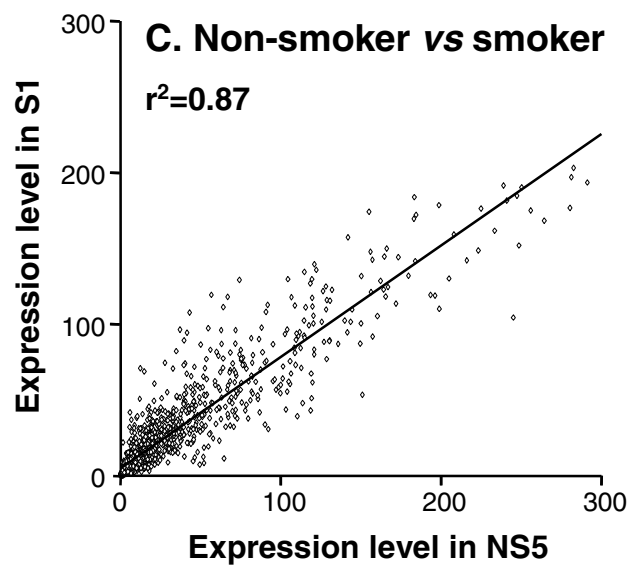

**Supplemental Figure 1.** Examples of the correlation in gene expression levels in alveolar macrophages for non-smokers and smokers. Expression levels, normalized by array, for the 1,582 genes present on all microarrays are plotted for representative comparisons. Comparison of gene expression levels in alveolar macrophages from: **a.** Two non-smokers (NS2 and NS5); **b.** Two smokers (S3 and S4); and **c** a non-smoker and a smoker (NS5 and S1). All comparisons revealed highly significant ( $p < 0.001$  in all cases) correlations with high  $r^2$  values, indicating overall similarity in global gene expression levels among individuals.
